1  
2  
3  
4  
5  
6  
7  
8  
9  
10  
11  
12  
13  
14  
15  
16  
17  
18  
19  
20  
21

**A Microsporidian blocks *Plasmodium falciparum* transmission in *Anopheles arabiensis*  
mosquitoes**

Jeremy K. Herren<sup>1,2\*</sup>, Lilian Mbaisi<sup>1,3⊕</sup>, Enock Mararo<sup>1⊕</sup>, Joseph W. Oundo<sup>1</sup>, Edward E. Makhulu<sup>1</sup>, Hellen Butungi<sup>1,4</sup>, Maria Vittoria Mancini<sup>2</sup>, Victor A. Mobegi<sup>3,5</sup>, Jordan Jabara<sup>1</sup>, Steven P. Sinkins<sup>2</sup>

<sup>1</sup> International Centre of Insect Physiology and Ecology (ICIPE), Kasarani, Nairobi, Kenya

<sup>2</sup> MRC-University of Glasgow Centre for Virus Research, Glasgow, UK

<sup>3</sup> Centre for Biotechnology and Bioinformatics (CEBIB), University of Nairobi, Nairobi, Kenya

<sup>4</sup> University of Witwatersrand, Institute for Malaria Research, Johannesburg, South Africa

<sup>5</sup> Department of Biochemistry, University of Nairobi, Nairobi, Kenya

\* Correspondence to: [jherren@icipe.org](mailto:jherren@icipe.org).

⊕ Denotes equal contribution.

22 **Malaria imposes an enormous burden on sub-Saharan Africa, and evidence that incidence**  
23 **could be starting to increase again<sup>1</sup> suggests the limits of currently applied control strategies**  
24 **have now been reached. A possible novel control approach involves the dissemination in**  
25 **mosquitoes of inherited symbiotic microbes to block transmission. This strategy is**  
26 **exemplified by the use of transmission-blocking *Wolbachia* in *Aedes aegypti* against dengue**  
27 **virus<sup>2-7</sup>. However, in the *Anopheles gambiae* complex, the primary African vectors of**  
28 **malaria, there limited reports of inherited symbionts with transmission-blocking capacity<sup>8-</sup>**  
29 **<sup>10</sup>. Here we show that a newly discovered vertically transmitted species of *Microsporidia***  
30 **symbiont in the *An. gambiae* complex blocks *Plasmodium* transmission. *Microsporidia MB* is**  
31 **present at moderate prevalence in geographically dispersed populations of *An. arabiensis***  
32 **in Kenya, localized to the mosquito midgut and ovaries, and is not associated with significant**  
33 **reductions in adult host fecundity or survival. Field collected *Microsporidia MB*-infected *An.***  
34 ***arabiensis* were never found to harbor *P. falciparum* gametocytes and on experimental**  
35 **infection with *P. falciparum* no sporozoites could be detected in *Microsporidia MB*-infected**  
36 **mosquitos. As a *Plasmodium* transmission-blocking microbe that is non-virulent and**  
37 **vertically transmitted, *Microsporidia MB* could be exploited as a novel malaria control tool.**

38 Microsporidia are a group of obligately intracellular simple eukaryotes, classified within or as a  
39 sister group to fungi, and found in a wide range of hosts, but most commonly invertebrates. Their  
40 lifecycles include a meront phase during proliferation, and spores with chitinous cell walls  
41 involved in host to host transmission through spore ingestion. Species with solely horizontal  
42 transmission usually show greater virulence and lower host specificity, but where a combination  
43 of horizontal and vertical transovarial transmission occurs, lower virulence is advantageous, and  
44 is normally associated with a higher degree of host specificity<sup>11-12</sup>. Sex ratio distortion toward

45 females has been reported (a manipulation characteristic of transovarially transmitted symbionts),  
46 for example *Dictyocoela* microsporidia in Amphipod crustaceans<sup>13</sup>. Various microsporidia species  
47 have been reported in mosquitoes<sup>14-25</sup>, with simple or complex lifecycles<sup>14</sup> but all of which are  
48 pathogens where virulence is primarily associated with larval mortality or reduced adult fecundity  
49 and lifespan<sup>14-20</sup>.

50 In this study a previously unknown species of *Microsporidia* was discovered during microbiome  
51 characterization of *An. arabiensis*, designated *Microsporidia MB*, and was found to occur at a high  
52 density and low to moderate prevalence (0-10%) in geographically dispersed populations of *An.*  
53 *arabiensis* in Kenya. Notably, in all *An. arabiensis* populations investigated, we observed that  
54 none of the *Microsporidia MB* harboring mosquitoes were infected with *Plasmodium* (Extended  
55 Data Fig. 1). Phylogenetic analysis of the 18S ribosomal gene revealed that *Microsporidia MB* is  
56 related to *Crispospora chironomi*<sup>26</sup>, a species recently identified from non-biting midges. The 18S  
57 gene sequence of *Microsporidia MB* shows 97% similarity with *Crispospora chironomi*.  
58 *Microsporidia MB* and *Crispospora chironomi* are in clade IV that unites microsporidia of  
59 terrestrial origin infecting diverse hosts<sup>27</sup> (Fig. 1A and Extended data Fig. 1). The previous reports  
60 of microsporidia infecting *Anopheles* mosquitoes all belong to different clades of *Microsporidia*.  
61 The morphology of *Microsporidia MB* closely resembles *Crispospora chironomi*, exhibiting both  
62 polysporoblastic and diplosporoblastic sporogonies, both found in the larval mosquito gut

63

epithelium (Fig. 1B).

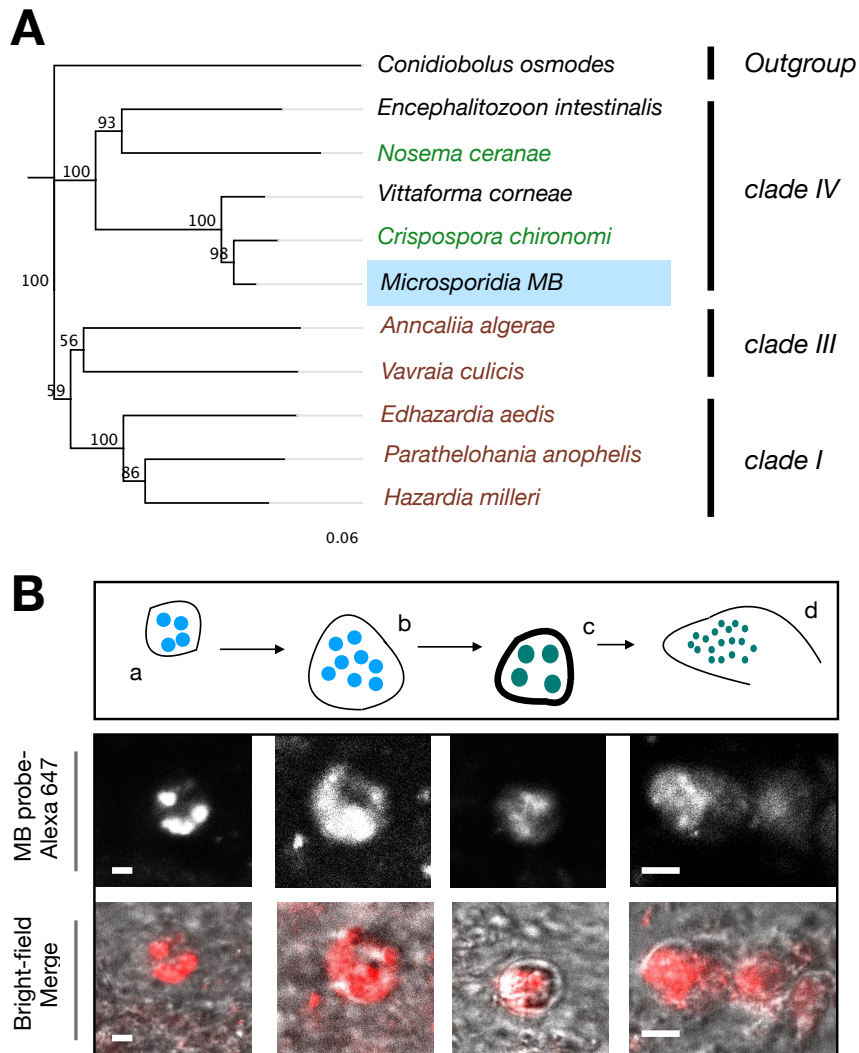

64

65 **Figure 1: Novel Microsporidian associated with *An. arabiensis* populations in Kenya.** (A) 18S rDNA-based phylogeny reveals  
66 that *Microsporidia MB* are in clade IV of the Microsporidia. Labelled in brown are the microsporidian species known from  
67 mosquitoes. In green are microsporidians associated with other insect groups. (B) FISH staining of the diplokaryotic stages of  
68 *Microsporidia MB* merogony (a-b) and spore capsule formation (c-d) in *An. arabiensis* larval gut epithelial tissues. Scale bar, 1.5  
69  $\mu\text{m}$ .

70

The effects of *Microsporidia MB* on *Plasmodium* infection in *An. arabiensis* was further examined

71 around Mbita point, western Kenya, using G<sub>1</sub> offspring pools obtained from field-collected G<sub>0</sub>  
72 mosquitoes and membrane feeding assays (MFAs) carried out with *Plasmodium falciparum*  
73 infected donor blood. Since there was a low to moderate prevalence of *Microsporidia MB* in field  
74 populations (Extended Data Fig. 2), we screened mosquitoes for *Microsporidia MB* and sorted  
75 them to ensure that G<sub>1</sub> progeny pools used for MFAs would have both *Microsporidia MB*-infected  
76 and uninfected mosquitoes. *Plasmodium* was quantified 10 days after MFAs, and a strong negative  
77 correlation was apparent between the *Microsporidia MB* and the presence of *Plasmodium* in whole  
78 mosquitoes 10 days after MFA (Fig. 2A-B). *Plasmodium* parasites in an ingested bloodmeal  
79 undergo a series of developmental changes prior to traversing the peritrophic matrix and midgut  
80 epithelium to form a sporogonic oocyst, which releases sporozoites into the hemocoel. From the  
81 hemocoel, sporozoites travel to the salivary gland, traverse an epithelium and mix with *Anopheles*  
82 saliva resulting in an infectious mosquito, usually 8-14 days after the blood meal<sup>28</sup>. To investigate  
83 the stage at which *Plasmodium* development was inhibited, we specifically quantified *Plasmodium*  
84 in the *Anopheles arabiensis* head and thorax and abdominal compartments. The absence of  
85 *Plasmodium* in the head and thorax compartment of *Microsporidia MB* infected *Anopheles*  
86 *arabiensis* 10 days after MFA indicates that *Microsporidia MB* prevents *Anopheles arabiensis*  
87 salivary glands from being colonized by *Plasmodium* sporozoites, and therefore prevents  
88 *Plasmodium* transmission (Fig. 2C-D). In addition, no *Plasmodium* oocysts are established in the  
89 midgut of *Microsporidia MB* infected *Anopheles arabiensis* as determined by the absence of  
90 *Plasmodium* infections in abdomens 10 days after MFA (Extended data Fig. 3). These results  
91 indicate that *Microsporidia MB*-induced transmission blocking occurs prior to the establishment

92

of oocysts in the *Anopheles* mosquito midgut.

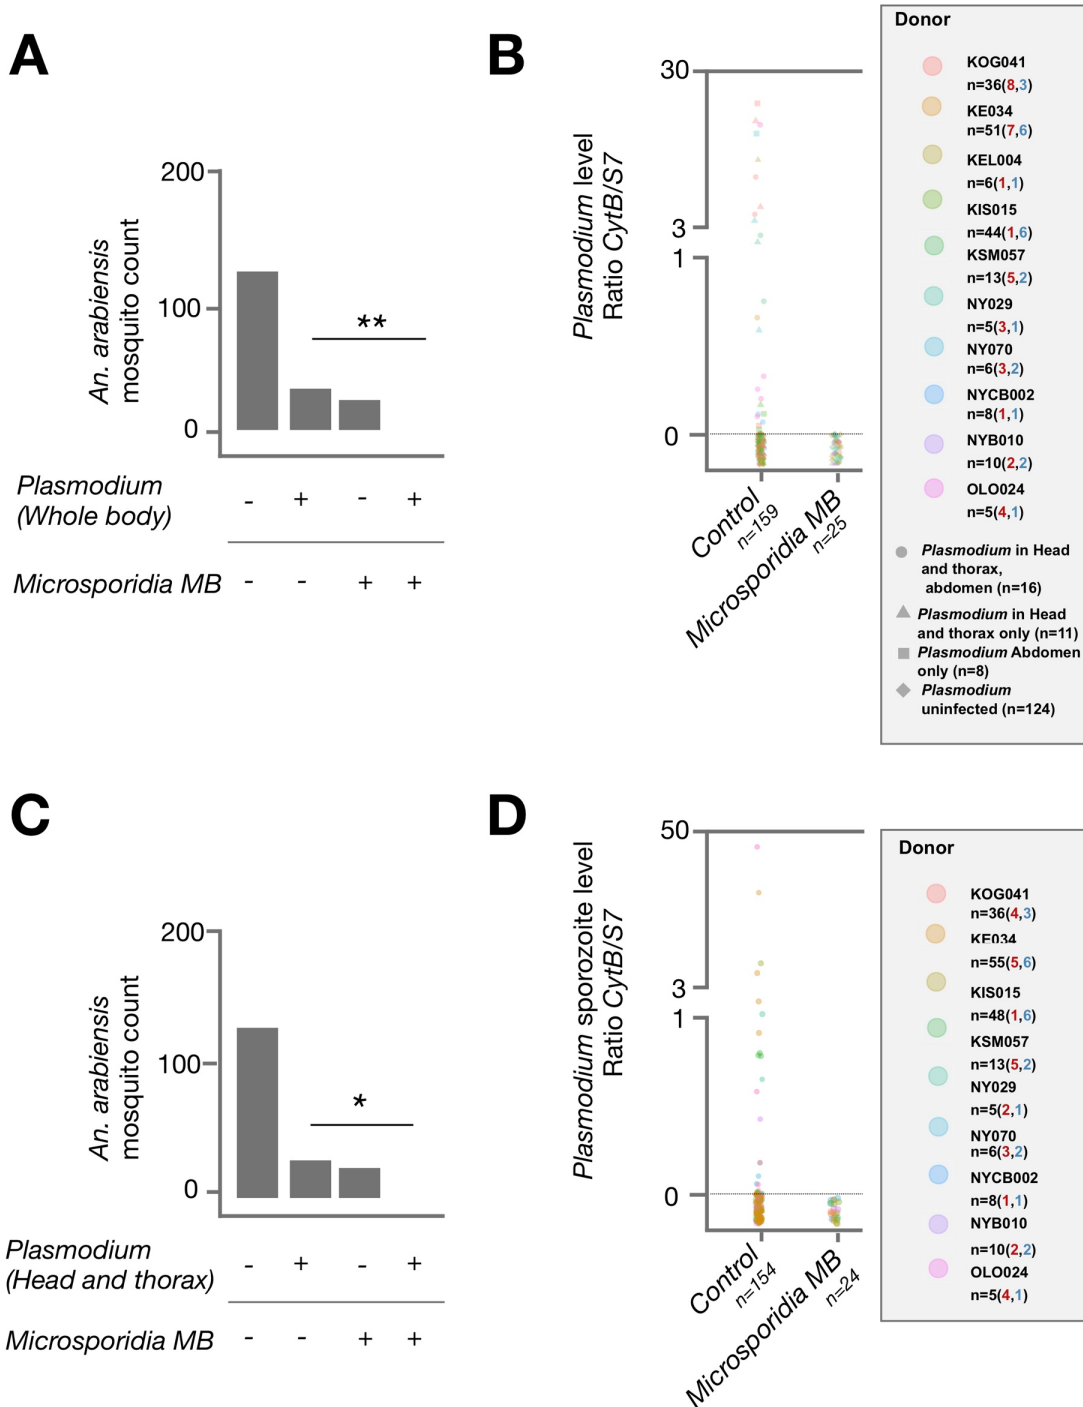

93

94 **Figure 2: *Microsporidia MB* blocks parasite development in *An. arabiensis* after membrane feeding assay challenge with *P.***

95 ***falciparum*.** (A) The *Plasmodium* infection rate in *Microsporidia MB* positive and *Microsporidia MB* negative mosquitoes was

96 determined by qPCR. There was a significant absence of co-infected mosquitoes (two tailed fisher exact test,  $P=0.005$   $N=184$ ). (B)  
97 *Plasmodium* density quantified by qPCR in *An. arabiensis*. For *An. arabiensis* mosquitos infected in both head and thorax and  
98 abdomen, average *Plasmodium* density across both compartments is given. (C) The head and thorax *Plasmodium* infection rate,  
99 reflecting presence of sporozoites, in *Microsporidia MB* positive and *Microsporidia MB* negative mosquitoes. There was a  
100 significant absence of co-infected mosquitoes (two tailed fisher exact test,  $P=0.02$   $N=178$ ). (D) *Plasmodium* density in *An.*  
101 *arabiensis* heads and thoraxes, quantified by qPCR in. Data shown in A,B, C, D is pooled from replicate experiments carried out  
102 using different gametocyte donors (for each donor the numbers of *Plasmodium* positive *An. arabiensis* is shown in red and  
103 *Microsporidia MB* positives *An. arabiensis* is shown in blue). Each data point is an individual *An. arabiensis* mosquito. If  
104 *Plasmodium* was detected in either head and thorax or abdomens or both compartments, the *An. arabiensis* was considered to have  
105 a *Plasmodium* infection (A,B). Heads and thoraxes were separated and screened individually for head and thorax specific infection  
106 rate (C,D).

107 *Microsporidia MB* are generally maternally transmitted with high efficiency (Fig. 3A), from 45-  
108 100%. However, a number of wild-caught females with low *Microsporidia MB* density did not  
109 transmit or transmitted very poorly to their offspring. It is possible that these infections might be  
110 newly acquired and have not yet become localized to the ovaries, a likely requirement for high-  
111 efficiency maternal transmission. *Microsporidia MB* were observed in the mosquito ovaries, where  
112 the symbiont colonizes and penetrates oocytes (Fig. 3B).

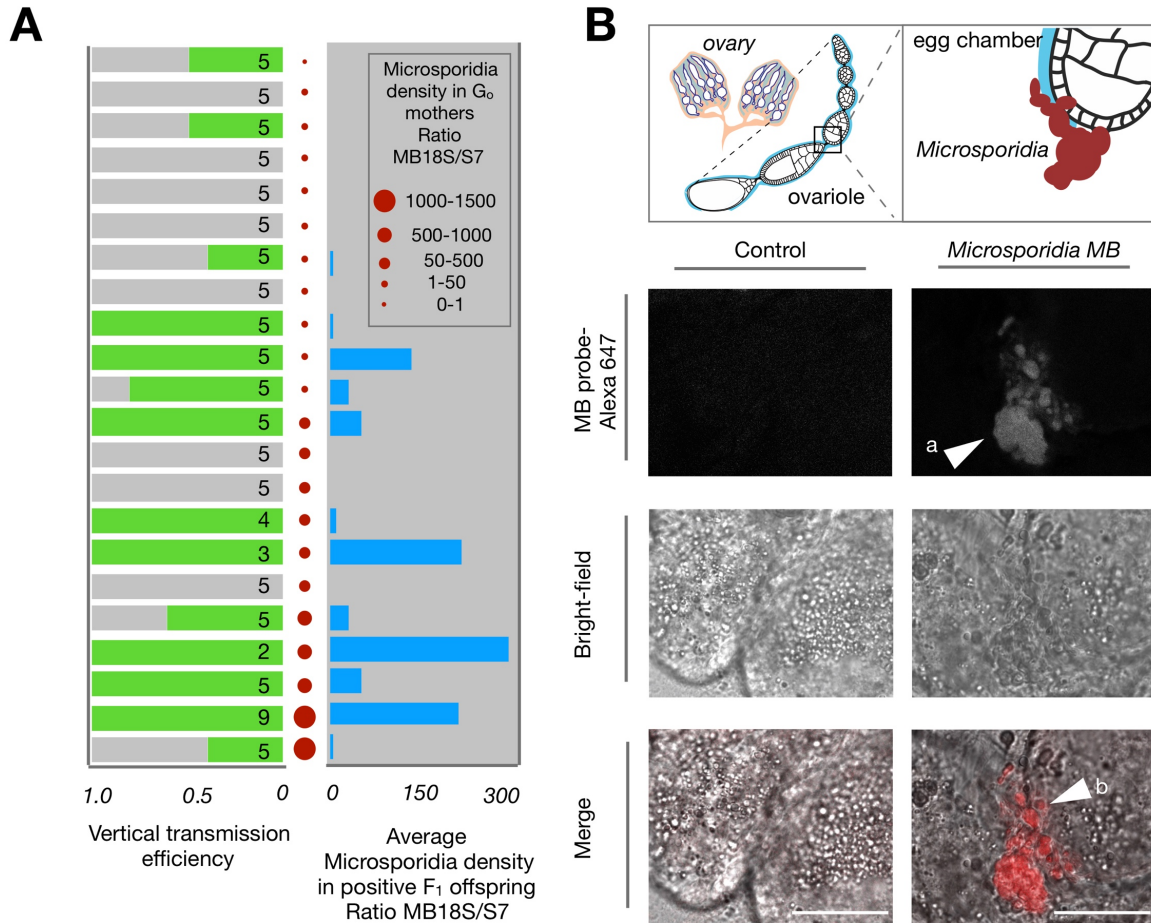

113

114 **Figure 3: *Microsporidia MB* is maternally transmitted.** (A) The vertical transmission efficiency and density of *Microsporidia*  
 115 *MB* in  $G_1$ s depends on the  $G_0$  (maternal) *Microsporidia MB* density. Each red dot represents a *Microsporidia MB*-infected  $G_0$   
 116 female *Anopheles arabiensis* mosquito. The density of *Microsporidia MB* in  $G_0$  females is reflected by the size of the red dot.  
 117 Green bars depict the vertical transmission efficiency from  $G_0$  to  $G_1$ , whereas blue bars depict the density of *Microsporidia MB* in  
 118  $G_1$ s. Numbers of  $G_1$ s tested to determine vertical transmission efficiency and *Microsporidia MB* density are given in the bars. (B)  
 119 Fluorescence microscopy with a *Microsporidia MB*-specific FISH probe (MB probe) indicates that *Microsporidia MB* (a) is  
 120 localized to the posterior of developing vitellogenic egg chambers (b) in *An. arabiensis*. Scale bar, 20  $\mu$ m.

121 The fecundity and egg to adult survival rate of *Microsporidia MB* infected and uninfected iso-  
 122 female lineages were then examined. No significant differences were observed in the number of  
 123 eggs laid by *Microsporidia MB* infected versus uninfected individuals, indicating  
 124 that *Microsporidia MB* does not have a sterilizing effect on females (Fig. 4A). A shortened



125 development period from egg to adult was observed for individuals carrying *Microsporidia MB*  
126 (Fig. 4B). We investigated the survival of adult female mosquitoes harboring *Microsporidia MB*  
127 and found their longevity was similar to uninfected mosquitoes (Extended Data Fig. 3). The  
128 density of *Microsporidia MB* was examined across the lifecycle of the mosquito and was higher  
129 in adults than in larvae, but larval density is highly variable. Notably, *Microsporidia MB* levels are  
130 lower in recently emerged adults, increasing with mosquito age (Extended Data Fig. 3).

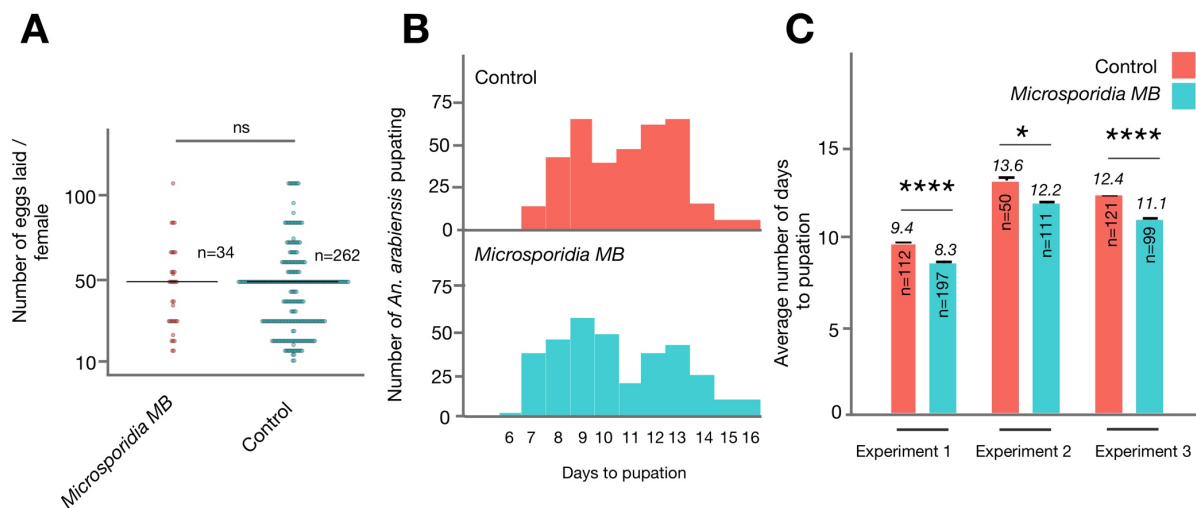

131  
132 **Figure 4: *Microsporidia MB* does not overtly decrease host fitness.** (A) *Microsporidia MB*-harboring wild-caught mosquitoes  
133 did not lay significantly less eggs than uninfected counterparts. Black line indicates means. (B) The F<sub>1</sub> larval progeny of  
134 *Microsporidia MB*-infected wild-caught females develop significantly faster than uninfected counterparts, data shown is pooled  
135 from three independent experiments. (C) The larval development of *Microsporidia MB*-infected *An. arabiensis* is on average 1.1,  
136 1.4 and 1.3 days less than uninfected controls in three independent experiments, error bars reflect SEM.

137 Several *Anopheles*-associated microsporidians have been shown to interfere with the infection and  
138 development of *Plasmodium*. *Nosema stegomyiae* disrupts the development of the oocysts in *An.*  
139 *gambiae*, attributed to mid-gut degradation and consequent disruption of *Plasmodium* binding<sup>24</sup>,  
140 while *Vavraia culicis* inhibition of development of *Plasmodium* has been associated with host  
141 innate immune priming<sup>25</sup>. The inhibitory effects observed in previous *Plasmodium* transmission

142 experiments have been relatively modest, with only partial reduction of transmission observed. In  
143 applied terms, given their virulence, their primary application would be as population suppression  
144 agents and the *Plasmodium* inhibition would provide a minor add-on. In contrast, complete *P.*  
145 *falciparum* transmission blocking was observed here for *Microsporidia MB*. Additionally,  
146 *Microsporidia MB* blocking occurs early, prior to the formation of *Plasmodium* oocysts in the  
147 *Anopheles* mosquito gut. When combined with the key characteristics that will facilitate  
148 artificially elevating its population frequency, namely spore production that is likely to facilitate  
149 dissemination, efficient transovarial transmission and apparently non-virulent interactions with  
150 *An. arabiensis* mosquitoes, *Microsporidia MB* is a realistic candidate for a stable vector population  
151 replacement strategy for malaria control.

152 These findings are significant in terms of regional malaria transmission and epidemiology as well  
153 as risk-mapping, and particularly in terms of the development of microbe-  
154 based *Plasmodium* transmission blocking tools. *Microsporidia MB* can be added to  
155 the *Anopheles*-associated gut bacteria that have previously been identified as able to  
156 reduce *Plasmodium* transmission when introduced into the mosquito<sup>29,30</sup>, or following  
157 introduction of anti-*Plasmodium* transgenes<sup>31</sup>. As an unmodified, *Anopheles*-associated inherited  
158 endosymbiont that confers highly effective malaria blocking under natural conditions, it is  
159 a promising prospect for malaria control.

160

## 161 **References:**

- 162 1. World Health Organization, *World Malaria Report* (World Health Organization, 2018);  
163 [www.who.int/malaria/publications/world-malaria-report-2018/en/](http://www.who.int/malaria/publications/world-malaria-report-2018/en/).

- 164 2. Moreira, L. A. *et al.* A *Wolbachia* symbiont in *Aedes aegypti* limits infection with dengue,  
165 chikungunya, and *Plasmodium*. *Cell* **139**, 1268-1278 (2009).
- 166 3. Bian, G., Xu, Y., Lu, P., Xie, Y., Xi, Z. The endosymbiotic bacterium *Wolbachia* induces  
167 resistance to dengue virus in *Aedes aegypti*. *PLoS Pathog.* **6**, e1000833 (2010).
- 168 4. Walker, T. *et al.* The wMel *Wolbachia* strain blocks dengue and invades caged *Aedes aegypti*  
169 populations. *Nature* **476**, 450-453 (2011).
- 170 5. Hoffmann, A. A. *et al.* Successful establishment of *Wolbachia* in *Aedes* populations to suppress  
171 dengue transmission. *Nature* **476**, 454-457 (2011).
- 172 6. Frentiu, F. D. *et al.* Limited dengue virus replication in field-collected *Aedes aegypti*  
173 mosquitoes infected with *Wolbachia*. *PLOS Negl. Trop. Dis.* **8**, e2688 (2014).
- 174 7. Ant, T. H., Herd, C. S., Geoghegan, V., Hoffmann, A. A., Sinkins, S. P. The *Wolbachia* strain  
175 wAu provides highly efficient virus transmission blocking in *Aedes aegypti*. *PLOS Pathog.* **14**,  
176 e1006815 (2018).
- 177 8. Baldini, F. *et al.* Evidence of natural *Wolbachia* infections in field populations of *Anopheles*  
178 *gambiae*. *Nat. Commun.* **5**, 3985 (2014).
- 179 9. Shaw, W.R. *et al.* *Wolbachia* infections in natural *Anopheles* populations affect egg laying  
180 and negatively correlate with *Plasmodium* development. *Nat. Commun.* **7**, 11772. (2016)
- 181 10. Gomes, F. M. *et al.* Effect of naturally occurring *Wolbachia* in *Anopheles gambiae* s.l.  
182 mosquitoes from Mali on *Plasmodium falciparum* malaria transmission. *Proc. Natl. Acad. Sci.*  
183 *U.S.A.* **114**, 12566-12571 (2017).
- 184 11. Desjardins, C. A. *et al.* Contrasting host-pathogen interactions and genome evolution in two generalist  
185 and specialist microsporidian pathogens of mosquitoes. *Nat. Commun.* **6**, 7121 (2015).
- 186 12. Zilio, G., Thiévent, K., Koella, J. C. Host genotype and environment affect the trade-off between  
187 horizontal and vertical transmission of the parasite *Edhazardia aedis*. *BMC Evol. Biol.* **18**, 59 (2018).

- 188 13. Ironside, J. E., Alexander, J. Microsporidian parasites feminise hosts without paramyxean co-infection:  
189 support for convergent evolution of parasitic feminisation. *Int. J. Parasitol.* **45**, 427-433 (2015).
- 190 14. Becnel, J. J. Effects of Microsporidia on Mosquito Vectors. in *Host Regulated Developmental*  
191 *Mechanisms in Vector Arthropods* (D. Borovsky and A. Spielman) pp. 240-245, U. of Florida, Vero  
192 Beach, FL. (1993).
- 193 15. Fox, R., Weiser, J. A Microsporidian parasite of *Anopheles gambiae* in Liberia. *J. Parasitol.* **45**, 21–30  
194 (1959).
- 195 16. Andreadis, T. G., Hall, D. W. Development, ultrastructure, and mode of transmission of *Amblyospora*  
196 sp. (Microspora) in the mosquito. *J. Protozool.* **26**, 444-52 (1979).
- 197 17. Hulls, R. H. The adverse effects of a microsporidian on the sporogony and infectivity of *Plasmodium*  
198 *berghei*. *Trans. R. Soc. Trop. Med. Hyg.* **65**, 421–423 (1971).
- 199 18. Ward, R. A., Savage, K. E. Effects of microsporidian parasites upon anopheline mosquitoes and  
200 malarial infection. *Proc. Helminthol. Soc. Wash.* **39**, 434–438 (1972).
- 201 19. Undeen, A. K., Alger, N. E. The effect of the microsporidian *Nosema algerae* on *Anopheles stephensi*.  
202 *J. Invert. Pathol.* **25**, 19–24 (1975).
- 203 20. Haq, N., Reisen, W. K., Ashlamkhan, M. The effects of *Nosema algerae* on the horizontal life table  
204 attributes of *Anopheles stephensi* under laboratory conditions. *J. Invert. Pathol.* **37**, 236–242 (1981).
- 205 21. Margos, G., Maier, W. A., Seitz, H. M. The effect of nosematosis on the development of *Plasmodium*  
206 *falciparum* in *Anopheles stephensi*. *Parasitol. Res.* **78**, 168–171 (1992).
- 207 22. Schenker, W., Maier, W. A., Seitz, H. M. The effects of *Nosema algerae* on the development of  
208 *Plasmodium yoelii nigeriensis* in *Anopheles stephensi*. *Parasitol. Res.* **78**, 56–59 (1992).
- 209 23. Koella, J. C., Agnew, P. Blood-feeding success of the mosquito *Aedes aegypti* depends on the  
210 transmission route of its parasite *Edhazardia aedis*. *Oikos* **78**, 311–316 (1997).

- 211 24. Gajanana, A., Tewari, S. C., Reuben, R., Rajagopalan, P. K. Partial suppression <sup>[11]</sup><sub>SEP</sub> of malaria parasites  
212 in *Aedes aegypti* and *Anopheles stephensi* doubly infected with *Nosema algerae* and *Plasmodium*.  
213 *Indian J. Med. Res.* **70**, 417–423 (1979).
- 214 25. Bargielowski, I., Koella, J. C. A possible mechanism for the suppression of *Plasmodium berghei*  
215 development in the mosquito *Anopheles gambiae* by the microsporidian *Vavraia culicis*. *PLOS One* **4**,  
216 e4676 (2009).
- 217 26. Tokarev, Y. S *et al.* Life cycle, ultrastructure, and molecular phylogeny of *Crispospora chironomi* g.n.  
218 sp.n. (Microsporidia: Terresporidia), a parasite of *Chironomus plumosus* L. (Diptera: Chironomidae).  
219 *Parasitol. Res.* **107**, 1381-1389 (2010).
- 220 27. Vossbrink, C.R., Debrunner-Vossbrink, B.A. Molecular phylogeny of the Microsporidia: ecological,  
221 ultrastructural and taxonomic considerations. *Folia Parasitol* **52**(1-2), 131-42 (2005).
- 222 28. Baton, L.A., Ranford-Cartwright, L.C. Spreading the seeds of million-murdering death:  
223 metamorphoses of malaria in the mosquito. *Trends Parasitol.* **21**, 573–580 (2005).
- 224 29. Cirimotich, C. M. *et al.* Natural microbe-mediated refractoriness to *Plasmodium* infection in  
225 *Anopheles gambiae*. *Science* **332**, 855-858 (2011).
- 226 30. Dennison, N. J. *et al.* Functional genomic analyses of *Enterobacter*, *Anopheles* and  
227 *Plasmodium* reciprocal interactions that impact vector competence. *Mal. J.* **15**, 425 (2016).
- 228 31. S. Wang *et al.* Driving mosquito refractoriness to *Plasmodium falciparum* with engineered  
229 symbiotic bacteria. *Science* **357**,1399-1402 (2017).

230

## 231 **Materials and Methods**

232

## 233 **Ethics statement**

234 Ethical clearance (Kenya Medical Research Institute Scientific and Ethics Review Unit:  
235 KEMRI/RES/7/3/1 and Glasgow MLVS College Ethics Committee: Project Number 200170001)  
236 was obtained prior to human blood sample collection. Written informed consent was sought from  
237 parents and guardians of the children to allow minors to participate in the study. Consent was also  
238 obtained from heads of households that provided approval for indoor mosquito collection.

239

#### 240 **Data and materials availability statement**

241 All data is available in the main text or the extended data.

242

#### 243 **Sampling sites and collection**

244 *Microsporidia MB* and *Plasmodium* prevalence in wild *Anopheles arabiensis* mosquitoes was  
245 determined by collecting adult female mosquitoes from sites around Kenya: Mbita (Nyawiya,  
246 Mageta and Kirindo), Mwea (Mbui-Njeru), Busia (Funyala) and Ahero (Kigoche). *An. arabiensis*  
247 were collected inside houses and sheds using CDC light traps and by manual aspiration. For the  
248 establishment of *Microsporidia MB* harboring lines gravid mosquitoes were collected solely by  
249 manual aspiration inside houses and sheds. All mosquitoes were transported from the field to the  
250 *icipe*-TOC laboratories and insectaries alive in cages, each sample represents an individual wild  
251 caught mosquito.

252

#### 253 **Mosquito species identification**

254 All experiments were carried out on wild collected *Anopheles gambiae sl.*, which were identified  
255 morphologically. In all of the collection sites, *Anopheles arabiensis* is the most common member  
256 of the *An. gambiae* species complex, with >97% of complex members being identified as

257 *Anopheles arabiensis*. The species designation was confirmed using a molecular assay that  
258 differentiates *An. gambiae s.s.* and *An. arabiensis* using the SINE S200 X6.1 locus<sup>31</sup>. *Anopheles*  
259 samples that were not confirmed to be *Anopheles arabiensis* were excluded from analysis.

## 260

### 261 **Determination of Molecular Phylogeny of *Microsporidia MB***

262 *Microsporidia MB* positive *An. arabiensis* were initially identified by sequencing 18S amplicons  
263 amplified by the SSU rRNA primer pair F: 5'-CACCAGGTTGATTCTGCC-3'; R: 5'-  
264 TTATGATCCTGCTAATGGTTC-3', which targets phylogenetically diverse microsporidians<sup>32</sup>.  
265 The primer pair RPOBMBF 5'-ACAGTAGGTCACCTTGATTGAATGTC-3' and RPOBMBR 5'-  
266 TACCATGTGCTTAAGTCTTTGGT-3' was used to amplify the *rpoB* gene of *Microsporidia MB*.  
267 Amplicons were prepared from nine individual *An. arabiensis* from geographically dispersed  
268 sites, all individuals had identical 18S and *rpoB* fragment gene sequences. Prepared amplicons  
269 were cleaned using the USB<sup>®</sup> ExoSAP-IT<sup>®</sup> PCR Product Cleanup kit according to manufacturer's  
270 instructions and sent to Macrogen (Netherlands) for sequencing. Multiple sequence alignment was  
271 done using the MUSCLE algorithm<sup>33</sup> alongside reference sequences of other *Microsporidia*  
272 species obtained from NCBI. Tamura-Nei genetic distance model alongside Neighbour-joining  
273 tree building algorithm was used in the creation of phylogenies and evaluated with 10000  
274 replicates bootstrap support and 50% support threshold. Rooting was done using *Conidiobolus*  
275 *osmodes* as an outgroup. *Microsporidia MB* 18S rDNA and *rpoB* partial gene reference sequences  
276 have been submitted to Genbank, submission ID 2270798.

## 277

### 278 **Egg laying and establishment of lines**

279 Wild-caught gravid female mosquitoes were induced to oviposit inside a perforated 1.5ml micro  
280 centrifuge tube containing 50µl of distilled water and a soaked piece of Whatman paper towel.  
281 Eggs from each female were counted under a compound microscope using a paint brush and then  
282 dispensed into water tubs for larval development under optimal rearing conditions (a temperature  
283 of 30.5 °C and 30% humidity). Upon laying eggs, the G<sub>0</sub> females were screened for presence of  
284 *Microsporidia MB* by PCR. The number of eggs laid by *Microsporidia MB* infected and uninfected  
285 mosquitoes was recorded and two-tailed Mann Whitney U tests were used to determine statistical  
286 significance. The progeny from *Microsporidia MB* positive G<sub>0</sub> females were used for: i) the  
287 quantification of vertical transmission efficiency and ii) the establishment of iso-female  
288 *Microsporidia MB* infected lines, whereas lines with similar L1 larvae numbers (+/- 10  
289 individuals) were used as matched negative the controls for quantifying development time and  
290 survival. For each iso-female line two G<sub>1</sub> L4 larvae were screened to determine species and  
291 confirm infection status and the line was only considered infected if both were *Microsporidia MB*  
292 positive. For the quantification of density across developmental stages five infected iso-female  
293 lines were established, two of which were monitored until day eight and three of which were  
294 monitored until day fifteen. All the mosquitoes in each experiment were derived from a single  
295 infected female. To establish mixed (*Microsporidia MB* positive and negative) *An. arabiensis*  
296 pools for standard membrane feeding assays, eggs from *Microsporidia MB*-infected and  
297 uninfected females were combined and reared together at an approximate ratio of 3:1  
298 (*Microsporidia MB* infected: *Microsporidia MB* uninfected). Infection status was not determined  
299 at the larval stage for mixed pools.

300

301 **Mosquito rearing**



302 Larvae were reared under a controlled environment at 30.5 °C (+/- 2°C). Larvae were fed daily on  
303 TetraMin™ baby fish food and fresh double-distilled water added into their tubs every other day  
304 to maintain oxygen levels. Adult mosquitoes were reared at 30°C (+/- 2°C) and 70% humidity with  
305 a constant 12-hour day / night cycle. The adult mosquitoes were fed on 6% glucose soaked in  
306 cotton wool. For adult survival and larval development time measurements, the status of larvae  
307 and mosquitoes was recorded every 24hrs, the Log-Rank and two-tailed Mann Whitney U tests  
308 were used to determine levels of statistical significance, respectively.

309

### 310 ***Plasmodium* standard membrane feeding assays**

311 *Plasmodium* screening of human subjects was done in the regions surrounding Mbita using RDT  
312 kits (SD Bioline, UK). Microscopy was carried out on RDT-positive samples to confirm the  
313 presence of *P. falciparum* gametocytes. Gametocyte-positive blood used was mixed with an  
314 anticoagulant (heparin) and a total volume of 100µl was placed into mosquito mini-feeders at 37°C  
315 and covered in stretched parafilm. Mixed pools of 2-3 day old *An. arabiensis* (containing co-reared  
316 *Microsporidia MB* positive and negative mosquitoes) were starved for 5 hours (the sucrose source  
317 was replaced with water for the first 4 hours of starvation) prior to the standard membrane feeding  
318 assay. Mosquitoes were allowed to feed for an hour after which non blood-fed individuals were  
319 discarded. Blood-fed mosquitoes were then maintained for a period of 10 days post-infection and  
320 processed for the molecular detection of *Microsporidia MB* and *Plasmodium* oocysts and  
321 sporozoites. We only include experiments where there was greater than zero prevalence of  
322 *Microsporidia MB* and *Plasmodium* in the mixed pools of *Anopheles arabiensis*. Two-tailed Fisher  
323 exact tests were used to determine statistical significance. Each data point represents an individual  
324 mosquito.

325

326 **Specimen storage and DNA extraction**

327 All *An. arabiensis* specimens were dry frozen at -20°C in individual microcentrifuge tubes prior  
328 to DNA extraction. Prior to extraction, mosquitoes were sectioned into head and thorax (for  
329 detection and quantification of *Plasmodium* sporozoites) and abdomens (for detection and  
330 quantification of *Plasmodium* oocysts and *Microsporidia MB*). DNA was extracted from each  
331 section individually using the protein precipitation method (Puregene, Qiagen, Netherlands).

332

333 **Molecular detection and quantification of *Microsporidia MB***

334 *Microsporidia MB*-specific primers (MB18SF: CGCCGGCCGTGAAAAATTTA and MB18SR:  
335 CCTTGGACGTGGGAGCTATC) were designed to target the *Microsporidia MB* 18S rRNA gene  
336 region and tested for specificity on a variety of *Microsporidia*-infected mosquito controls  
337 (including *Hazardia*, *Parathelohania* and *Takaokaspora*). For detection, the PCR reaction volume  
338 was 10µl, consisting of 2µl HOTFirepol® Blend Master mix Ready-To-Load (Solis Biodyne,  
339 Estonia, mix composition: 7.5 mM Magnesium chloride, 2mM of each dNTPs, HOT FIREPol®  
340 DNA polymerase), 0.5µl of 5 pmol/µl of both forward and reverse primers, 2 µl of the template  
341 and 5 µl nuclease-free PCR water. The PCR cyclic conditions used were; initial denaturation at  
342 95°C for 15 minutes, further denaturation at 95°C for 1 minute, followed by annealing at 62°C for  
343 90 seconds and extension at 72°C for a further 60 seconds, all done for 35 cycles. Final elongation  
344 was done at 72°C for 5 minutes. *Microsporidia MB* was also quantified by qPCR using MB18SF/  
345 MB18SR primers, with normalization against the *Anopheles* ribosomal S7 host gene (primers,  
346 S7UF: GMCGGGTCTGWACCTTCTGG and S7UR: TCCTGGAGCTGGAARTGAAC). The  
347 qPCR reaction volume was 10µl, consisting of 2 µl HOT FIREPol® EvaGreen® HRM no ROX

348 Mix (Solis Biodyne, Estonia, mix composition: 12.5 mM Magnesium chloride, EvaGreen® dye,  
349 BSA, dNTPs, HOT FIREPol® DNA Polymerase and 5× EvaGreen® HRM buffer), 0.5µl of 5  
350 pmol/µl of both forward and reverse primers, 2 µl of the template and 5 µl nuclease-free PCR  
351 water. Finally, a melt curves were generated including temperature ranges from 65°C to 95°C.  
352 Standard curves were also generated to determine amplification efficiency.

353

### 354 **Molecular detection and quantification of *Plasmodium***

355 A qPCR-based assay was used to detect and quantify the *cytochrome b* gene of *Plasmodium*<sup>34</sup>.  
356 When utilized on *An. arabiensis* head and thorax DNA samples 10 days post MFA this assay can  
357 be used to detect and quantify *Plasmodium* sporozoites. When utilized on *An. arabiensis* abdomen  
358 DNA samples 10 days post MFA this assay can be used to detect and quantify *Plasmodium*  
359 oocysts. *Plasmodium cytochrome b* was normalized against the *Anopheles* ribosomal S7 host gene.  
360 The qPCR mastermix was composed of 2 µl HOT FIREPol® EvaGreen® HRM no ROX Mix (Solis  
361 Biodyne, Estonia, mix composition: 12.5 mM Magnesium chloride, EvaGreen® dye, BSA, dNTPs,  
362 HOT FIREPol® DNA Polymerase and 5× EvaGreen® HRM buffer), 0.5 µl of 5 pmol/µl of both  
363 forward (cytBF) and reverse (cytBR) primers, 2 µl of the template and 5 µl nuclease-free PCR  
364 water. The PCR profile for target gene amplification included an initial denaturation at 95 °C for  
365 15 minutes, further denaturation at 95 °C for 30 seconds, followed by annealing at 60 °C for 45  
366 seconds and extension at 72 °C for 45 seconds repeated for 40 cycles. Final elongation was  
367 performed at 72 °C for 7 minutes followed by generation of a melt curve ranging from 65 °C to 95  
368 °C. A standard curve was generated to determine the PCR efficiency.

369

### 370 **Fluorescence *in situ* Hybridisation (FISH)**

371 DNA probes specific to *Microsporidia MB* 18S rDNA were designed and synthesized (5'-CY5-  
372 CCCTGTCCACTATAACCTAATGAACAT-3', Macrogen, Netherlands). FISH was conducted on  
373 *An. arabiensis* adult and larval tissue specimens using a previously described protocol<sup>35</sup>, with  
374 minor modifications. Briefly, mosquito tissues (larval gut and adult ovaries) were fixed in 4%  
375 Paraformaldehyde (PFA) solution overnight at 4°C and subsequently transferred into 10%  
376 hydrogen peroxide in 6% alcohol for 3 days prior to rehydration in Phosphate Buffer Saline with  
377 Tween-20 (PBS-T) for 1–2 hours. Hybridization was conducted by incubating tissues in 150 µl  
378 hybridization buffer (20 mM Tris-HCl [pH 8.0], 0.9M NaCl, 0.01% sodium dodecyl sulfate, 30%  
379 formamide) containing 100 pmol/ml of the probe at room temperature overnight. After washing  
380 with PBS-T, the hybridized samples were placed on a slide and were visualized immediately using  
381 a Leica SP5 confocal microscope (Leica Microsystems, USA).

- 382 32. Santolamazza, F. *et al.* Insertion polymorphisms of SINE200 retrotransposons within  
383 speciation islands of *Anopheles gambiae* molecular forms. *Malar J.* **25**;7:163 (2008).
- 384 33. Ghosh, K., Weiss, L. M. Molecular diagnostic tests for microsporidia. *Interdiscip Perspect*  
385 *Infect Dis.* **2009**;926521 (2009).
- 386 34. Edgar, R. C. MUSCLE: multiple sequence alignment with high accuracy and high  
387 throughput. *Nucleic Acids Res.* **32**(5):1792-7 (2004).
- 388 35. Xu, W. *et al.* SYBR Green real-time PCR-RFLP assay targeting the plasmodium cytochrome  
389 B gene--a highly sensitive molecular tool for malaria parasite detection and species  
390 determination. *PLoS One.* **10**(3):e0120210 (2015).
- 391 36. Koga, R., Tsuchida, T., Fukatsu, T. Quenching autofluorescence of insect tissues for in situ  
392 detection of endosymbionts. *Applied Entomology and Zoology.* **44**(2):281–91 (2009).

393

#### 394 **Extended Data**

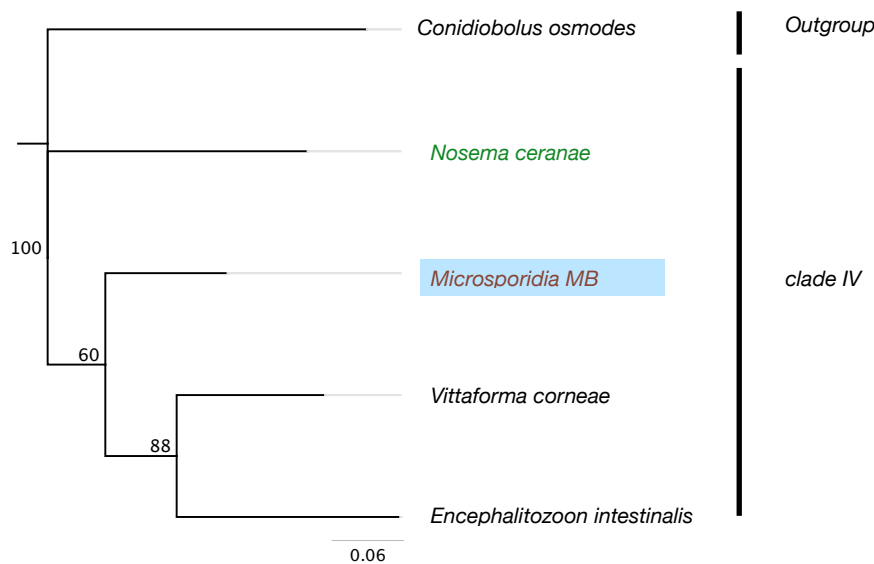

395

396 **Extended Data Figure 1: The RNA polymerase B' subunit gene (*rpoB*) based phylogeny**  
397 **reveals that *Microsporidia MB* are in clade IV of the *Microsporidia*.**

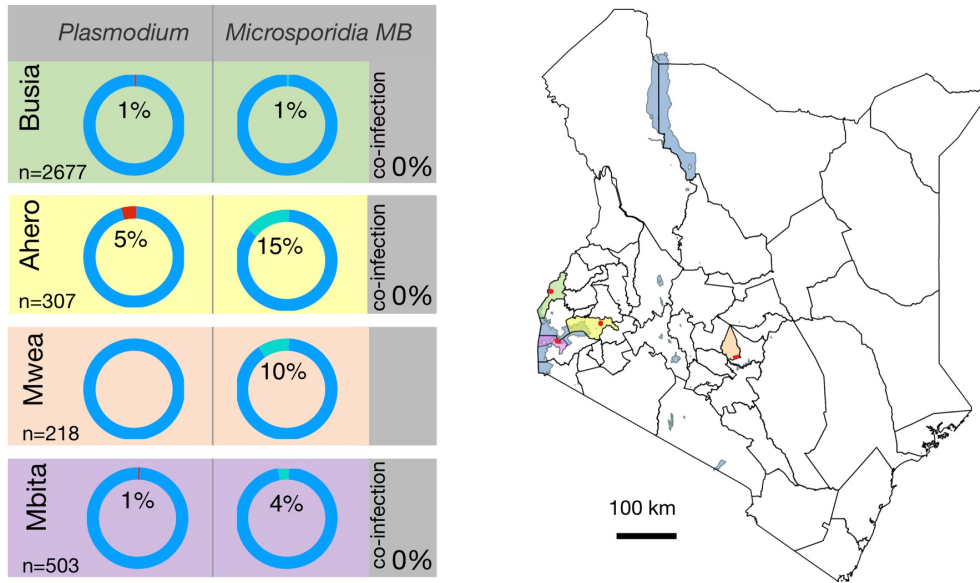

398

399 **Extended Data Figure 2: *Microsporidia MB* is found in geographically dispersed *An.***  
400 ***arabensis* populations. *Microsporidia MB* is found a prevalence range of 1-15% in *An. arabensis***  
401 **populations that also have a *Plasmodium* sporozoite infection prevalence range of 1-5%.**

402 *Microsporidia MB* and *Plasmodium* sporozoite co-infections were not observed. The color-coded  
403 locations of sampling sites are indicated on the map of Kenya.

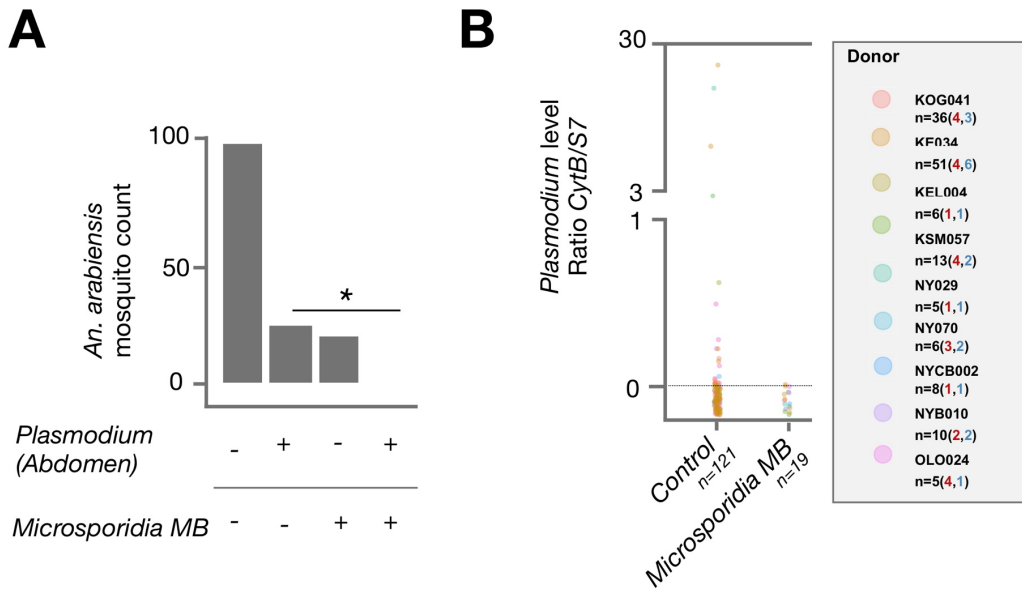

404

405 **Extended Data Figure 3: *Microsporidia MB* blocks oocyst formation in *An. arabiensis* after**  
406 **membrane feeding assay challenge with *P. falciparum*. The abdomen *Plasmodium* infection**  
407 **rate, reflecting presence of oocysts, in *Microsporidia MB* positive and *Microsporidia MB***

408 **negative mosquitoes. There was a significant absence of co-infected mosquitoes (two tailed**  
409 **fisher exact test,  $P=0.04$   $N=140$ ).**

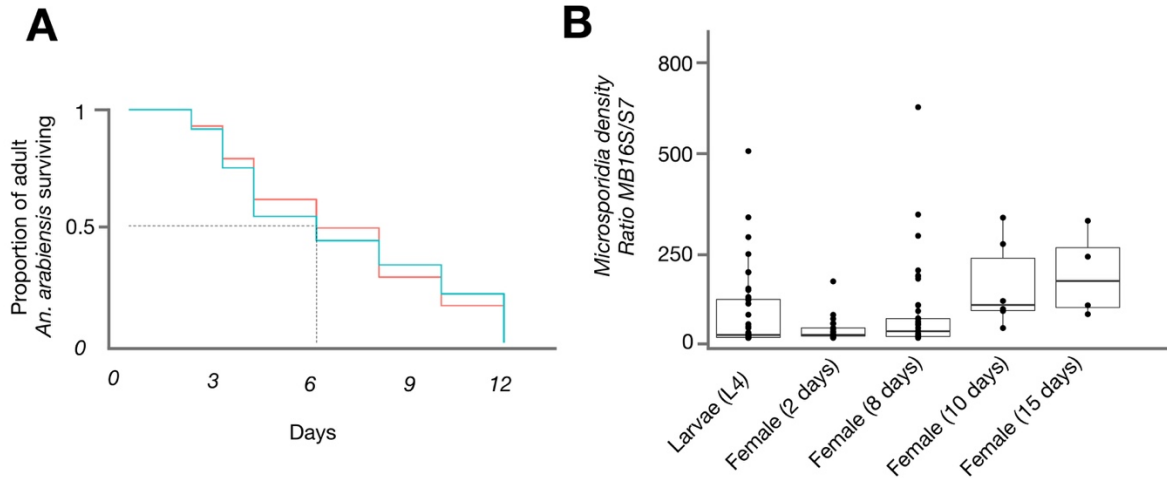

410  
411 **Extended Data Figure 4:** (A) The survival of adult  $G_1$  progeny of *Microsporidia MB* infected  
412 wild-caught females is not significantly different from uninfected counterparts, one experiment  
413 (ii) shown of three independent experiments (i-iii); (i,  $P=0.86$ ,  $N>9$ , ii,  $P=0.97$ ,  $N>41$ , ii,  $P=0.06$   
414  $N>50$ ,  $N$  denotes the minimum number of mosquitoes per condition). (B) The density of  
415 *Microsporidia MB* across different developmental stages. The density of *Microsporidia MB* is  
416 highly variable in larvae, lower in young adults but increase as adult *An. arabiensis* females age.  
417 Boxplot boundaries reflect the inter-quartile range. Each datapoint represents an individual  
418 mosquito from a total of five (L4-day 8) and three (day 10 and 15) independent experiments.

419  
420 **Acknowledgments:** We acknowledge Milcah Gitau of *icipe* Arthropod Rearing and Containment  
421 Unit for mosquito rearing assistance. We thank Ibrahim Kiche, Faith Kyengo and Ulrike Fillinger  
422 for assistance and advice. **Funding:** This work was supported by the Wellcome Trust [107372,



423 202888], the BBSRC [BB/R005338/1, sub-grant AV/PP015/1], the Scottish Research Council, the  
424 Swiss National Science Foundation [P2ELP3\_151932], the R. Geigy Foundation, the UK's  
425 Department for International Development (DFID); Swedish International Development  
426 Cooperation Agency (Sida); the Swiss Agency for Development and Cooperation (SDC); Federal  
427 Democratic Republic of Ethiopia and the Kenyan Government. **Author contributions:** J.K.H  
428 conceived and designed the majority of the experiments. E.M and L.M. performed the majority of  
429 experiments. J.O and E.M. collected mosquitoes, screened them and prepared them for  
430 experiments. H.B. and M.V.M. carried out transmission-blocking and molecular identification  
431 experiments, respectively. J.K.H., S.P.S., E.M., L.M., M.V.M. and V.A.M. analyzed the data.  
432 J.K.H and S.P.S. wrote the manuscript. **Competing interests:** Authors declare no competing  
433 interests.

434
